# Supplementary material for: Anti-Amyloid Aggregation Activity of Black Sesame Pigment: Toward a Novel Alzheimer’s Disease Preventive Agent
Source: MDPI journal article supplement (doi:10.3390/molecules23030676), 2018-03-16
Supplement: s1 [file s1]

## Supplementary Materials

# Anti-amyloid aggregation activity of black sesame pigment: toward a novel Alzheimer's disease preventive agent

Lucia Panzella <sup>1,\*</sup>, Thomas Eidenberger <sup>2</sup>, and Alessandra Napolitano <sup>1</sup>

<sup>1</sup> Department of Chemical Sciences, University of Naples "Federico II", Via Cintia 4, I-80126 Naples, Italy; alesnapo@unina.it

<sup>2</sup> School of Engineering and Environmental Sciences, Upper Austria University of Applied Sciences, Stelzhamerstraße 23, 4600 Wels, Austria; Thomas.Eidenberger@fh-wels.at

\* Correspondence: panzella@unina.it; Tel.: +39-081-674131

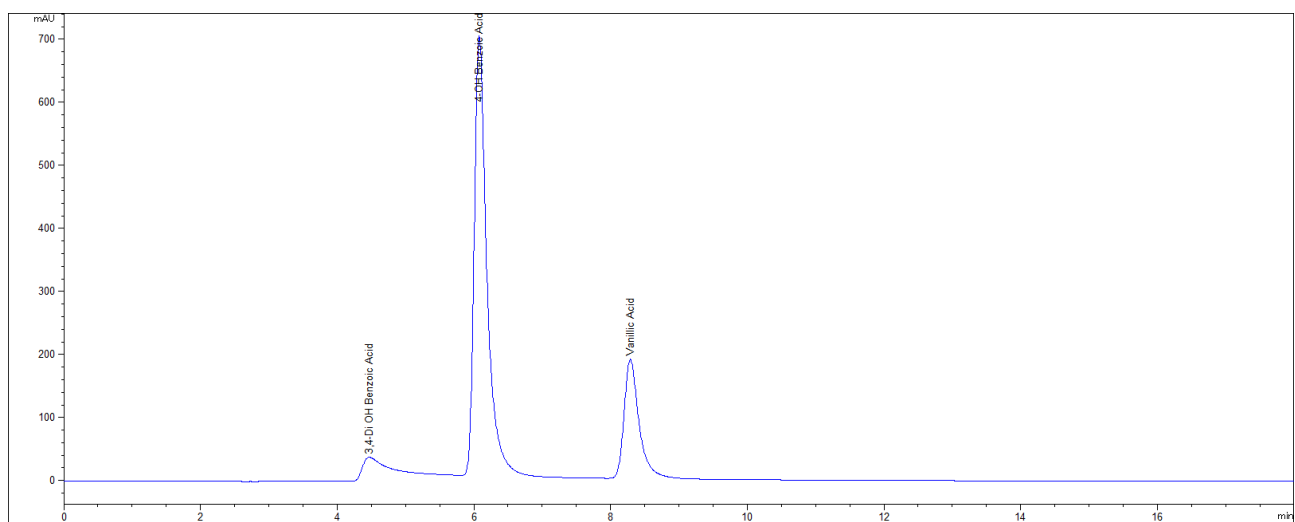

**Figure S1.** HPLC trace of a standard mixture containing 3,4-dihydroxybenzoic acid, 4-hydroxybenzoic acid and VA (same elution conditions of Figure 1).

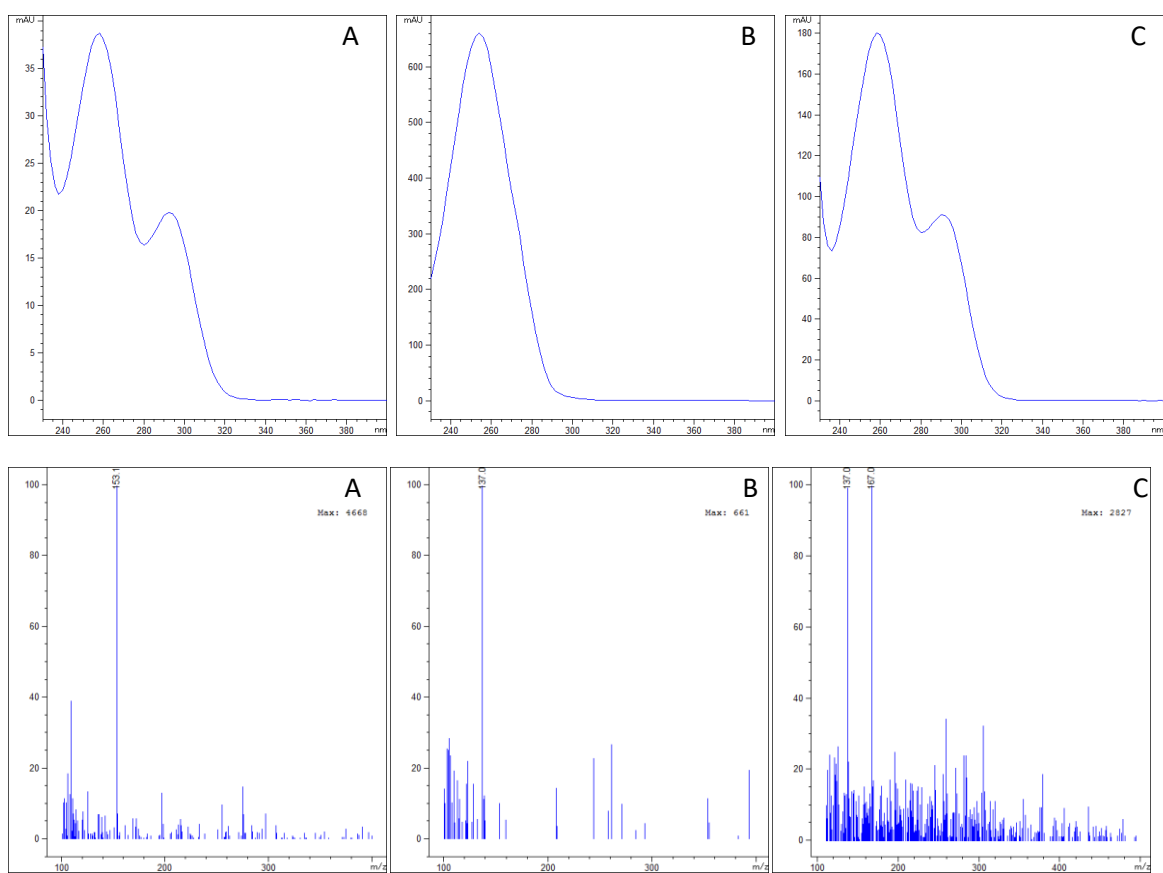

**Figure S2.** UV and mass spectra of the products A, B and C of Figure 1.

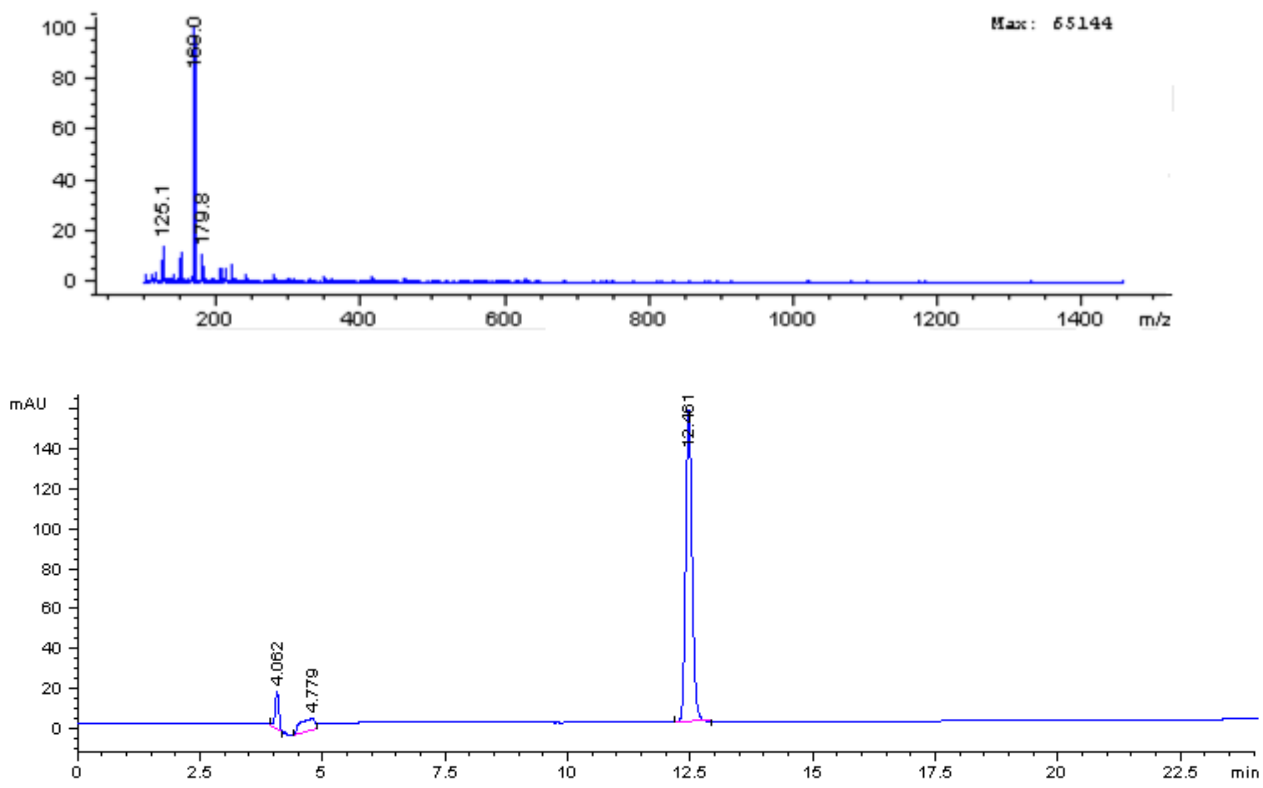

**Figure S3.** MS spectrum of the product eluted at 12.5 min and HPLC trace of standard VA (under the same elution conditions of Figure 2).

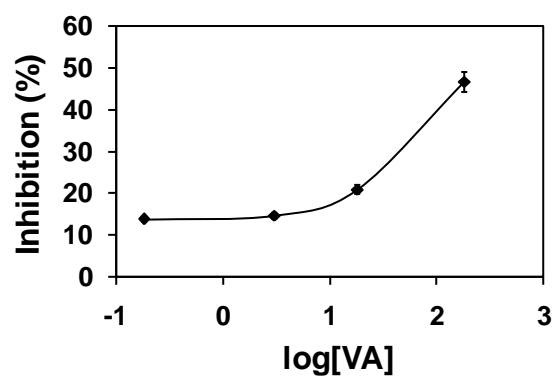

**Figure S4.** AChE inhibition by VA. Reported are the mean  $\pm$  SD values from at least three experiments.

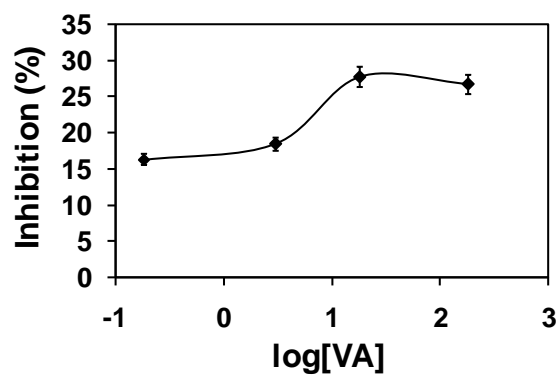

**Figure S5.** BChE inhibition by VA. Reported are the mean  $\pm$  SD values from at least three experiments.
